# Supplementary material for: Analysis of Phenolic Compounds in Commercial Cannabis sativa L. Inflorescences Using UHPLC-Q-Orbitrap HRMS
Source: PubMed Central journal article supplement (PMC7037164; doi:10.3390/molecules25030631), 2020-01-31
Supplement: molecules-25-00631-s001.pdf [file molecules-25-00631-s001.pdf]

## Supplementary materials:

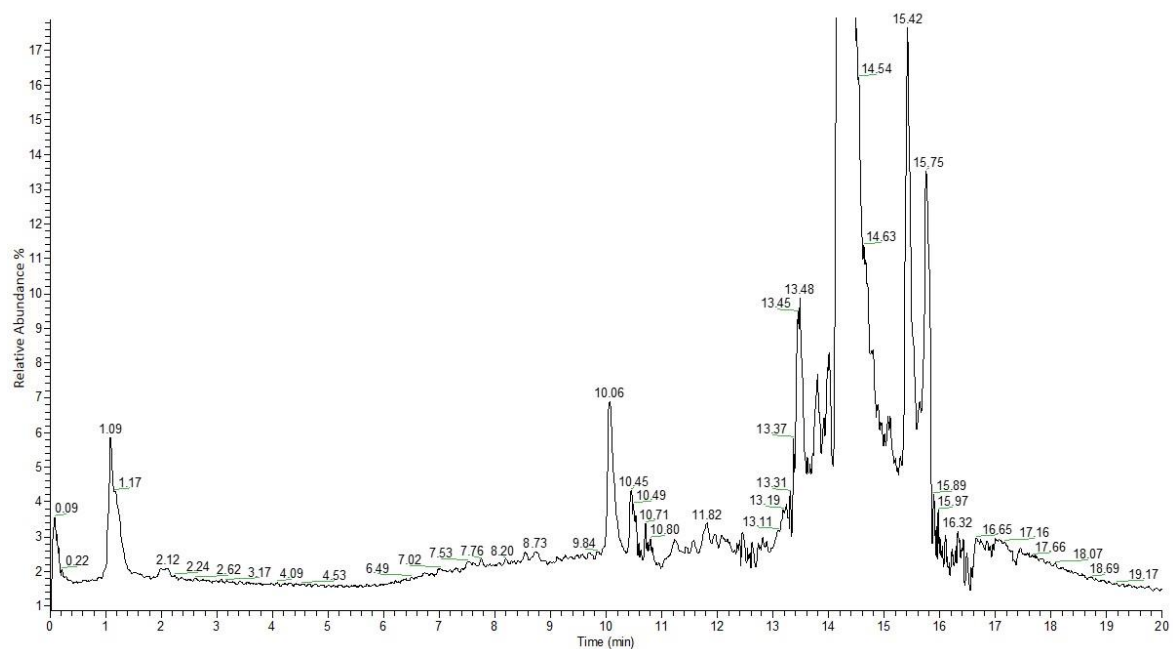

**Supplementary Figure S1.** Total Ion Chromatogram (TIC) of Carmagnola variety of *C. sativa* inflorescences through UHPLC-Q-Orbitrap HRMS.

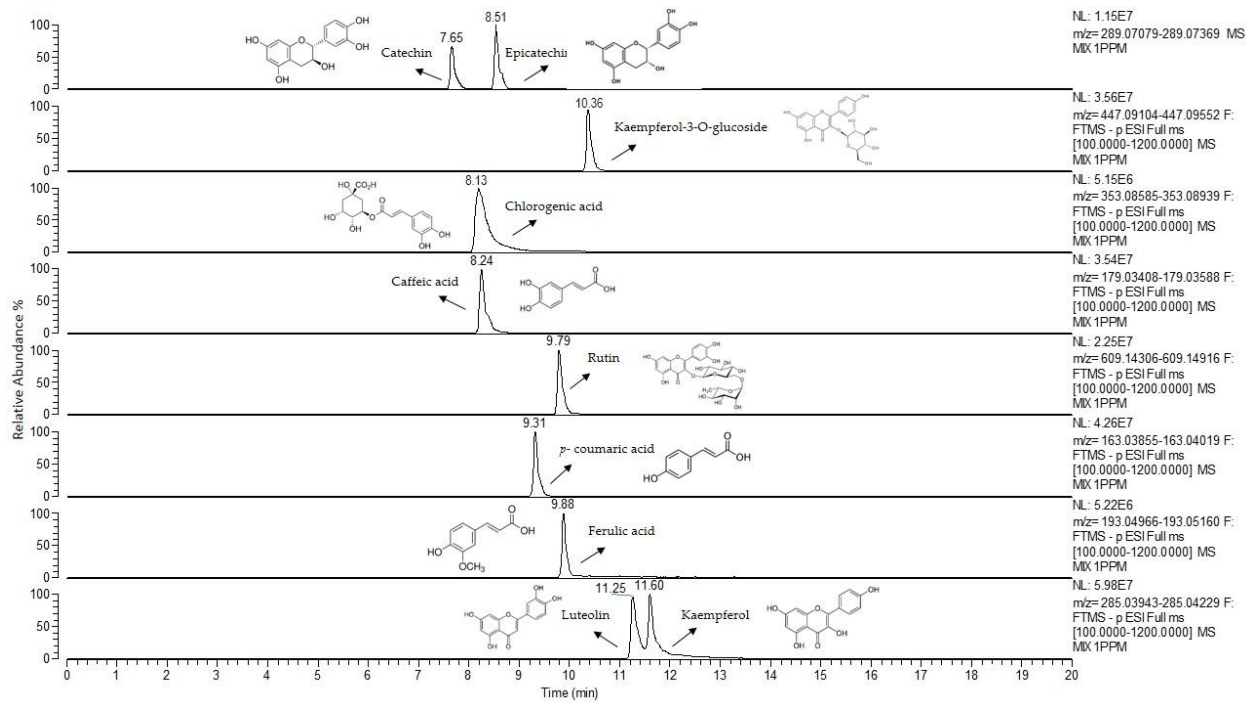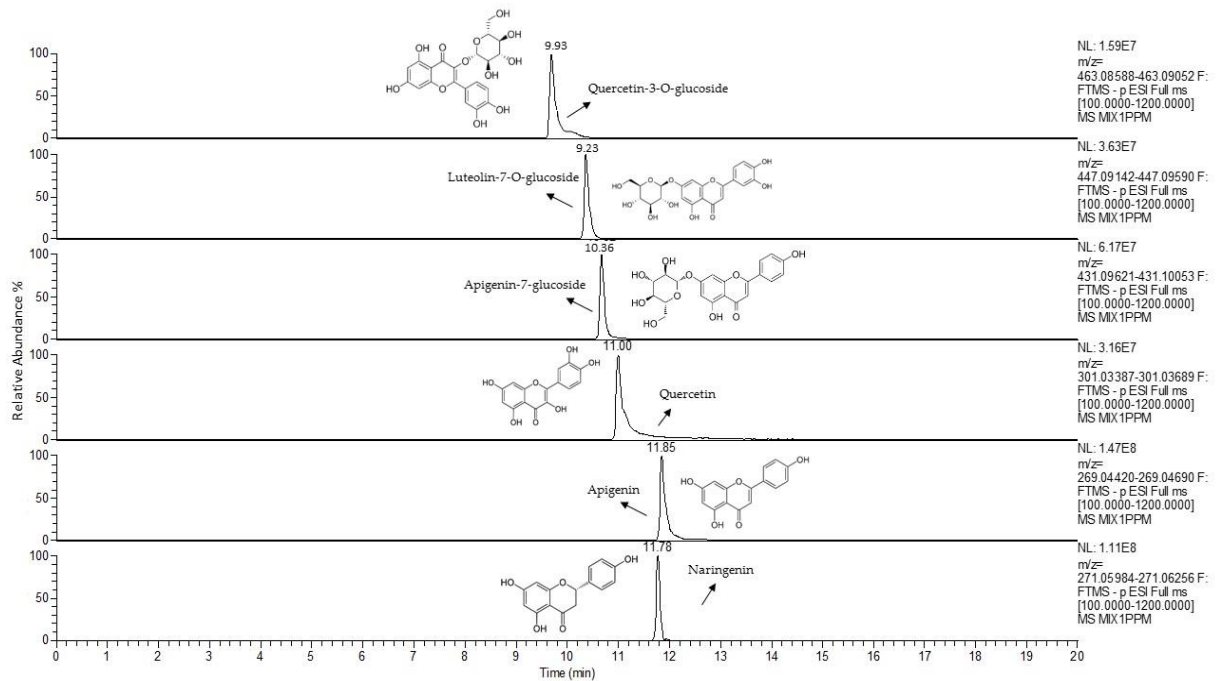

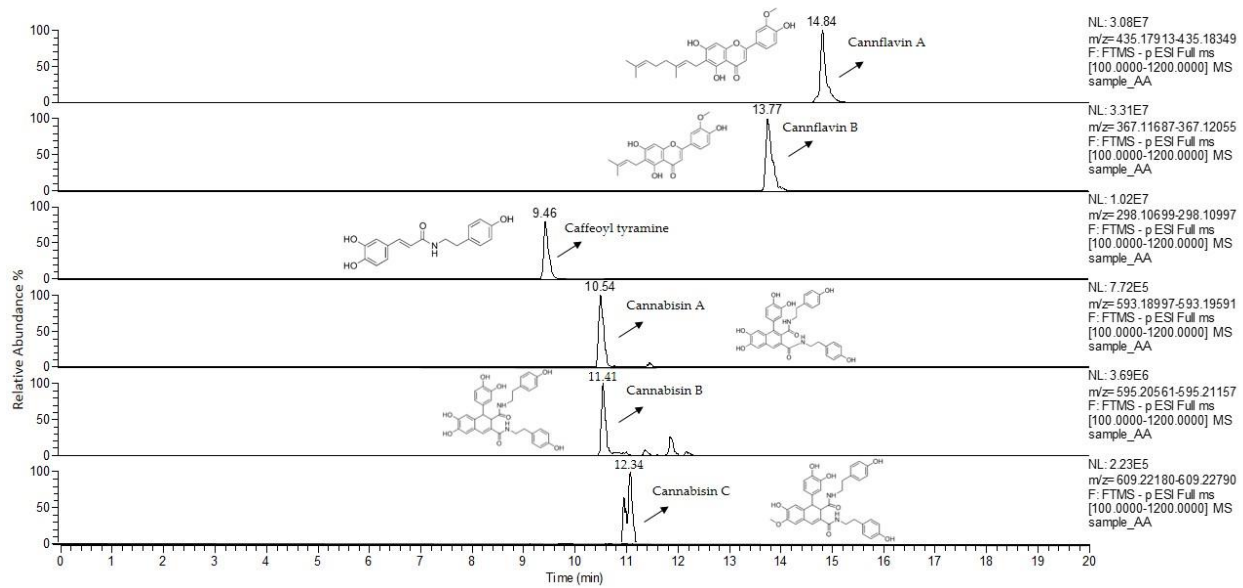

**Supplementary Figure S2.** Plots of twenty-two representative extracted ion chromatograms (EICs). The extracted EICs are represented with their specific  $m/z$ .

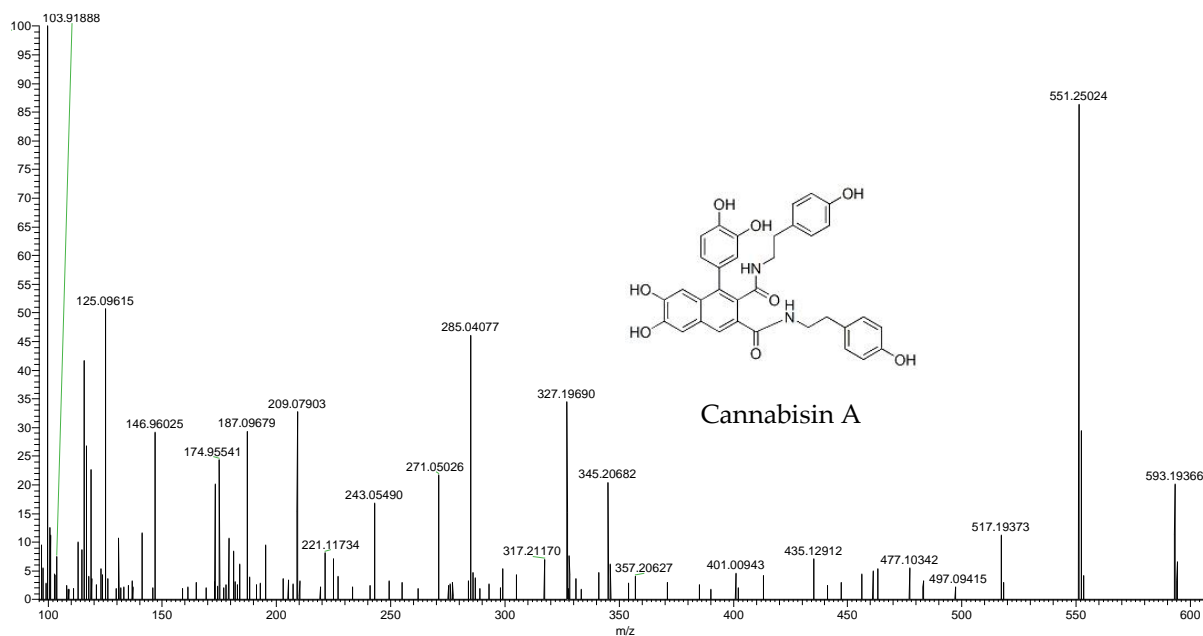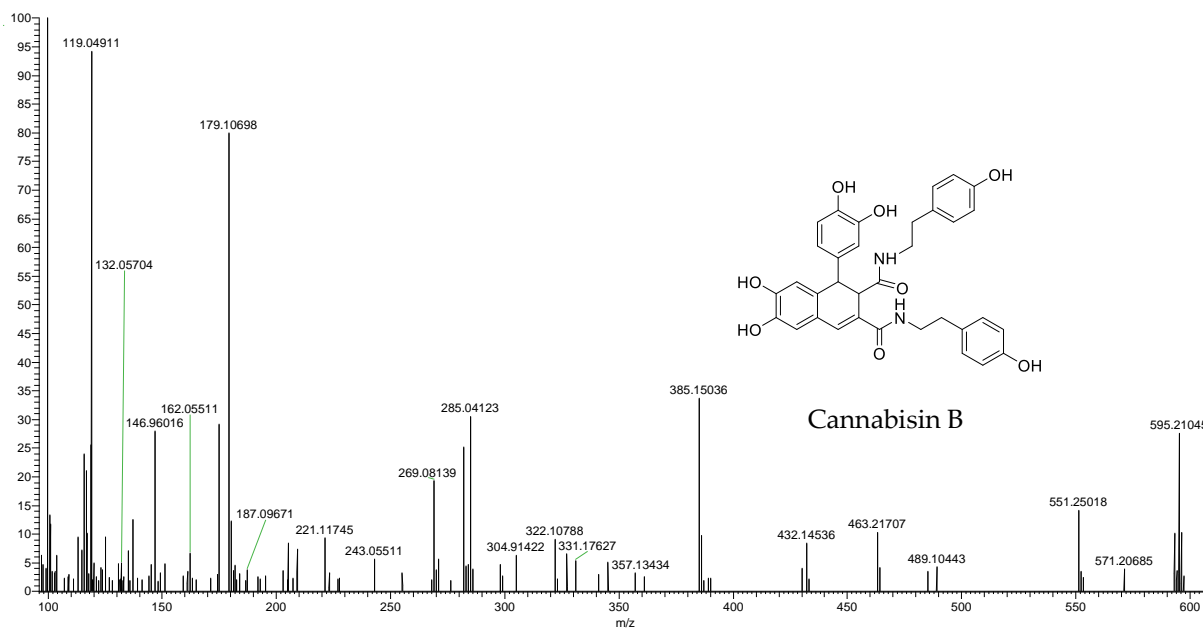

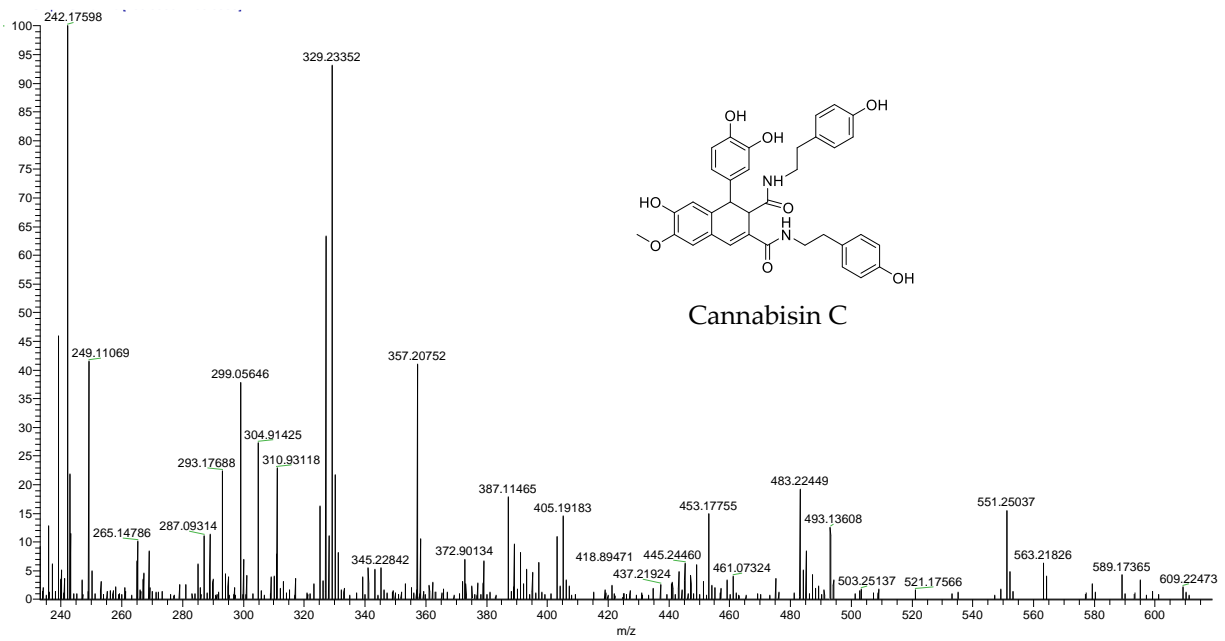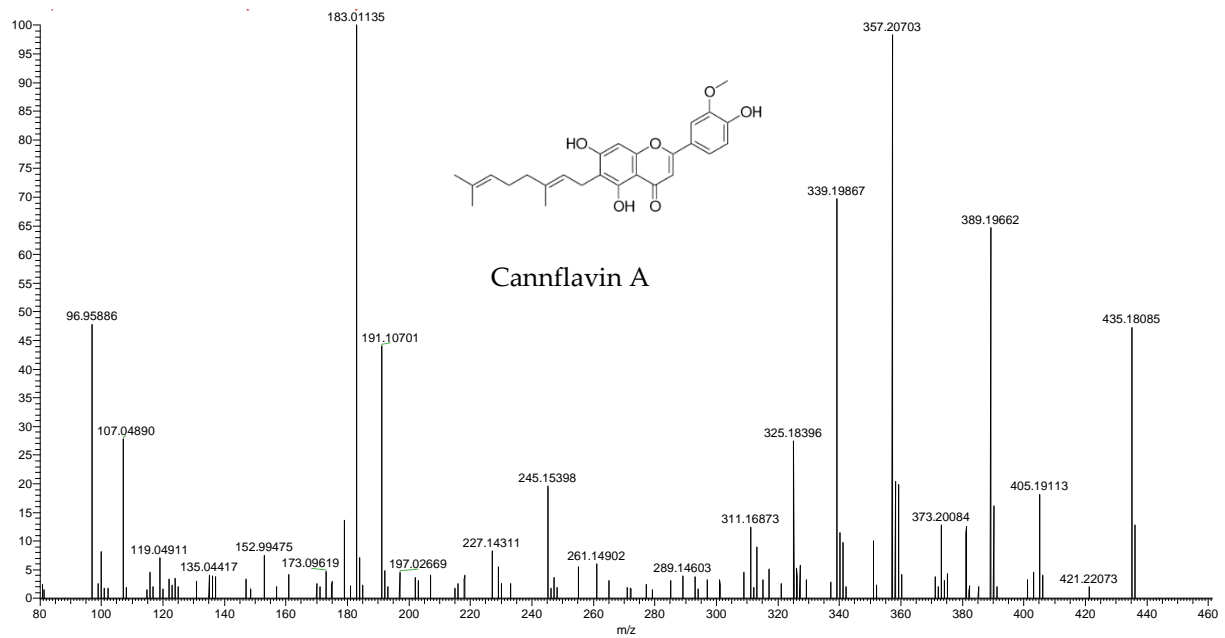

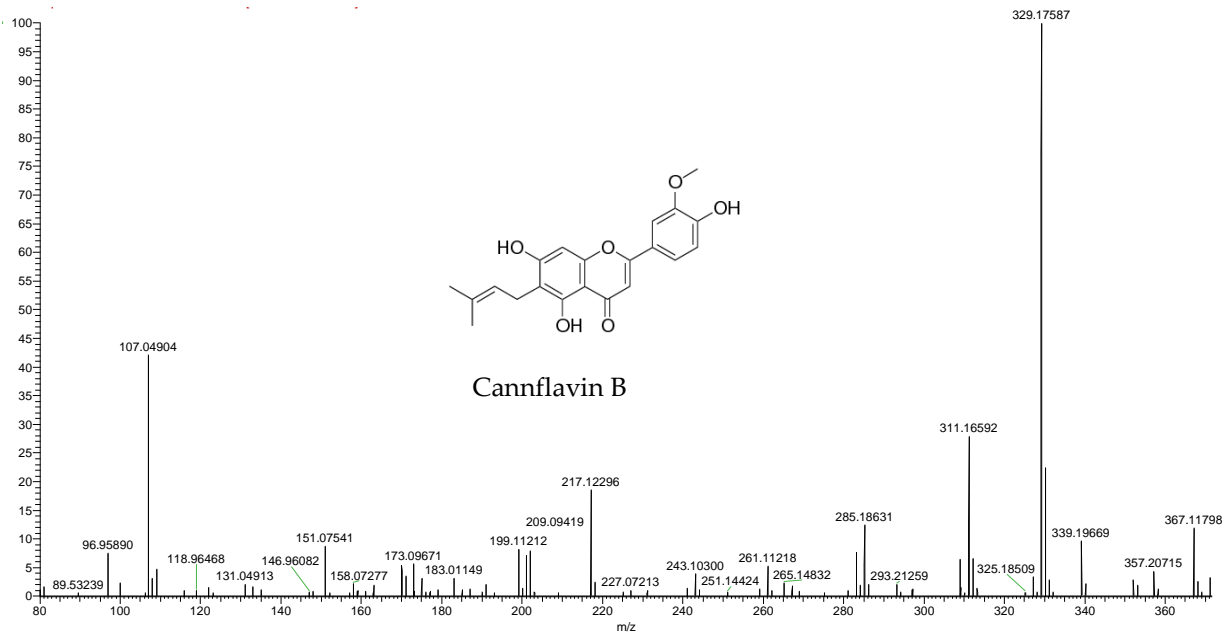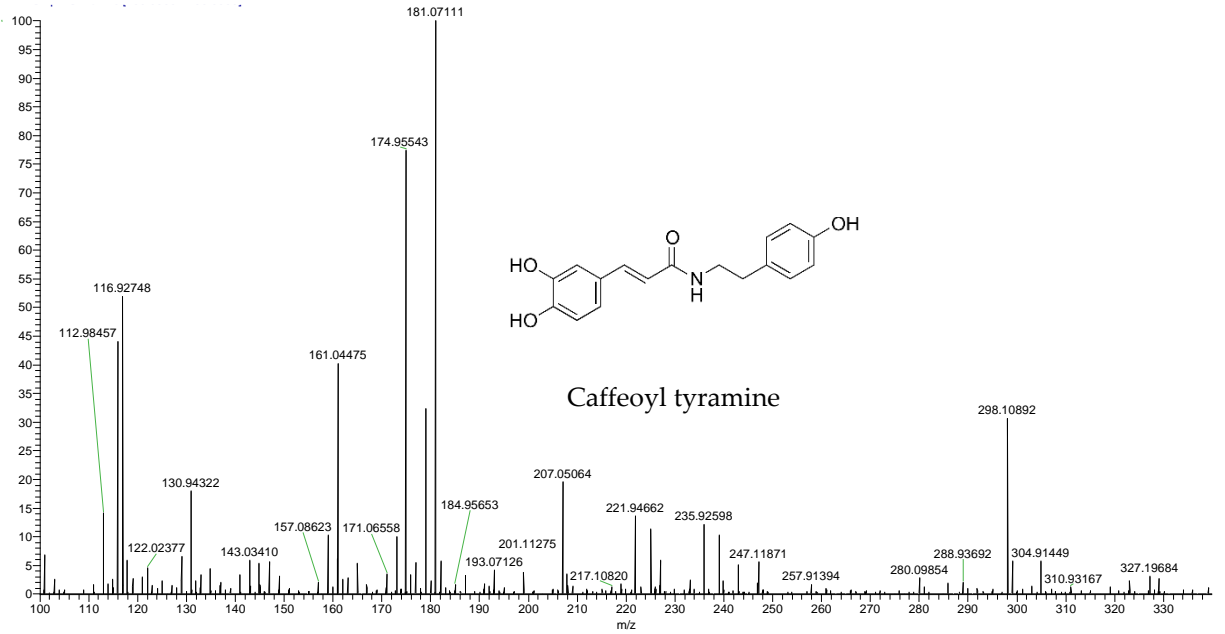

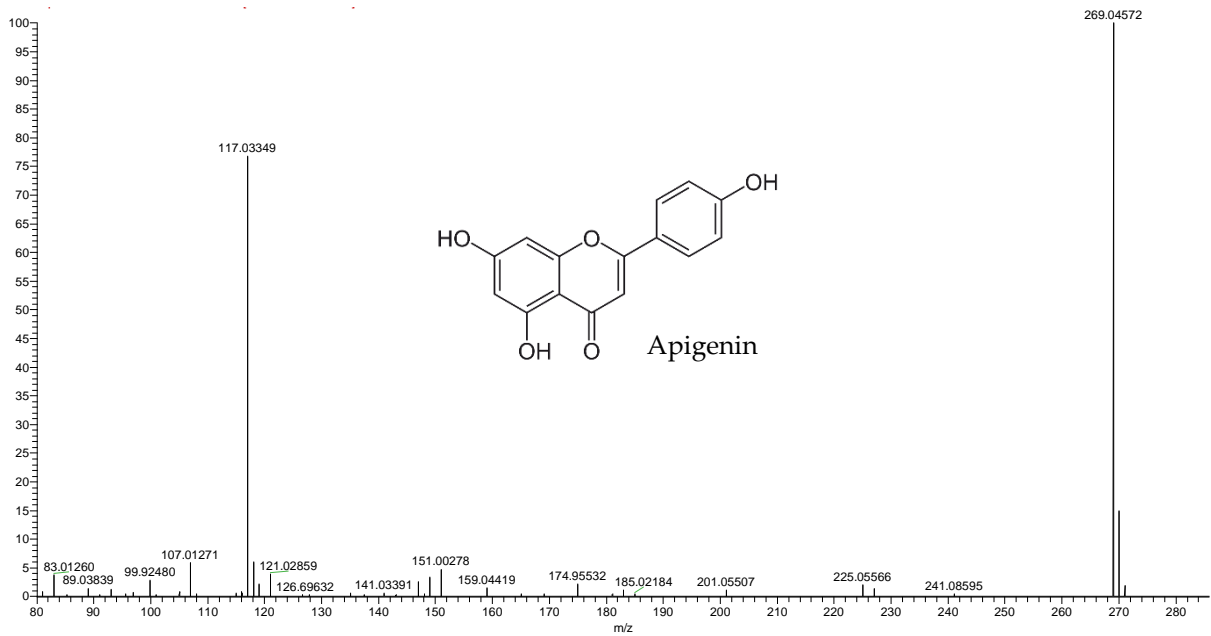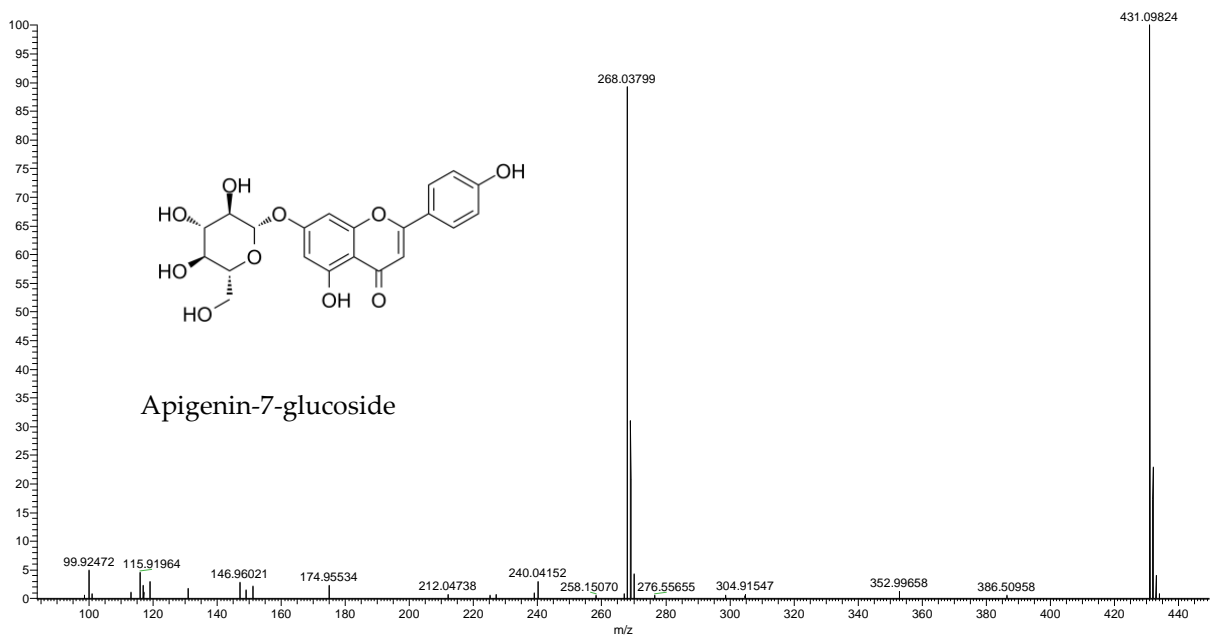

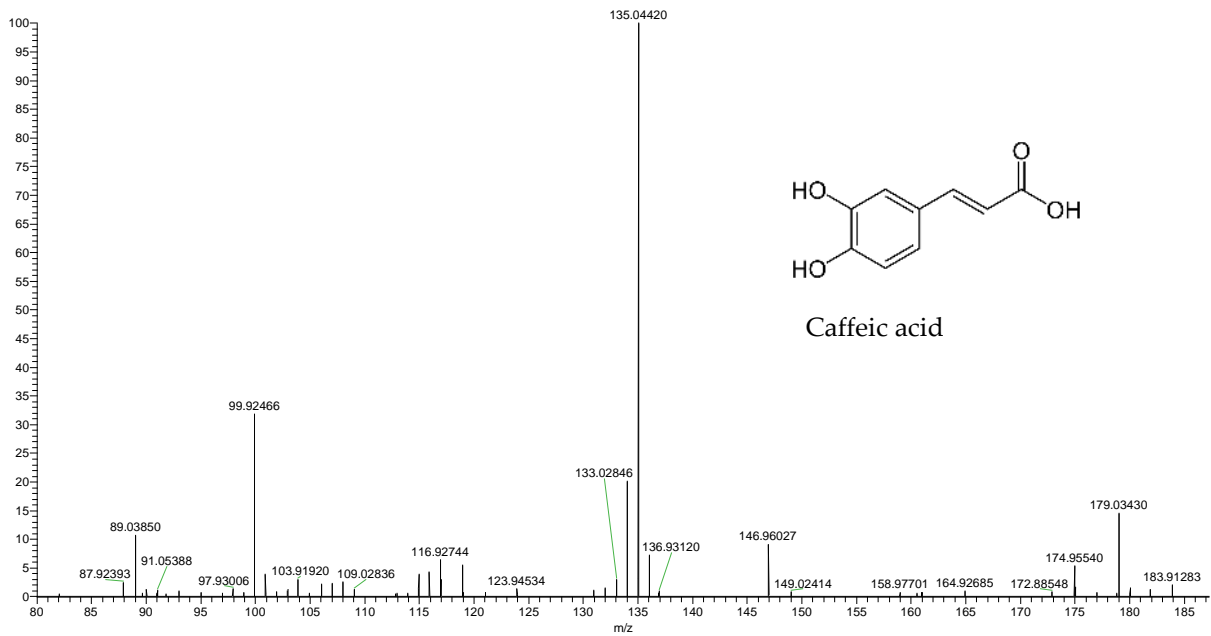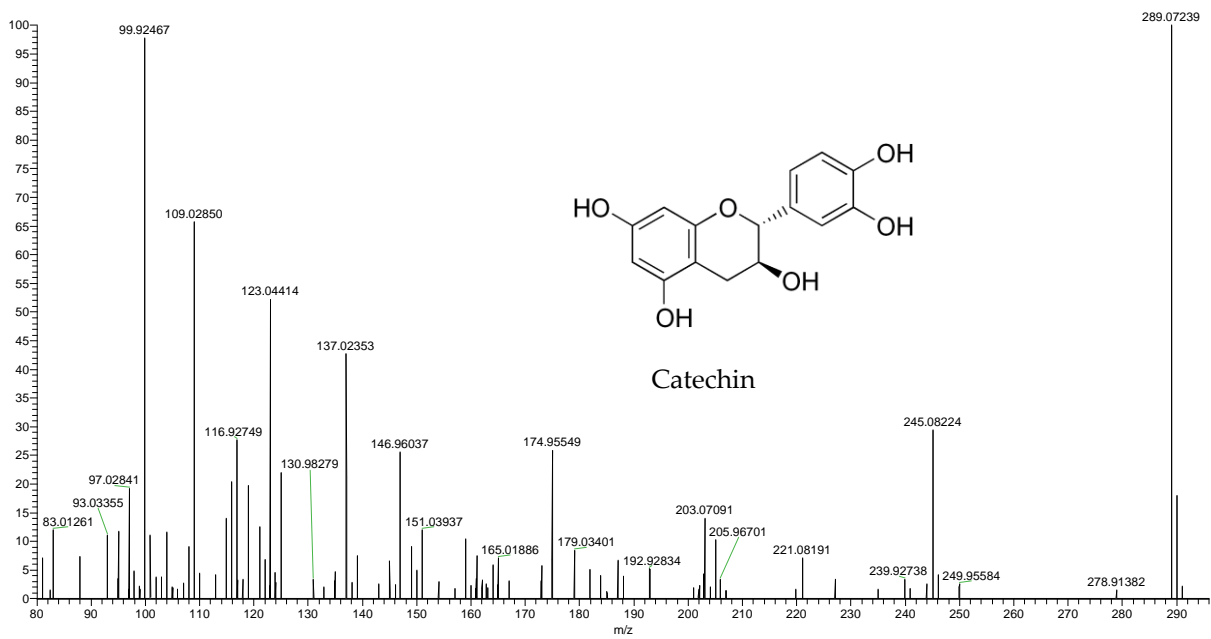



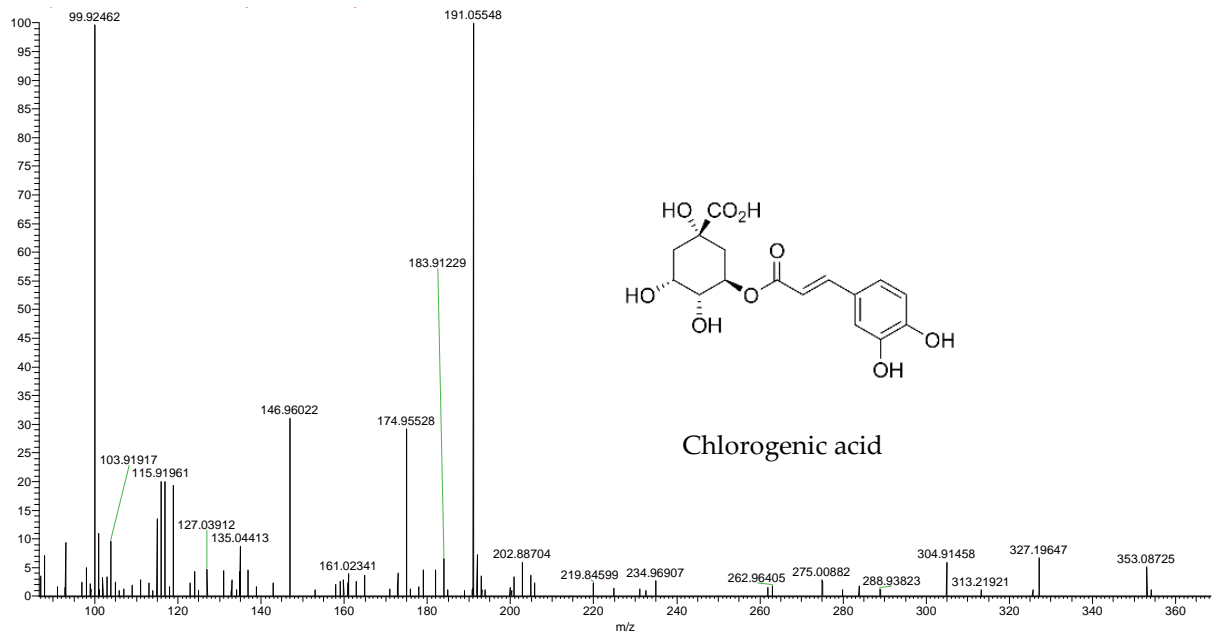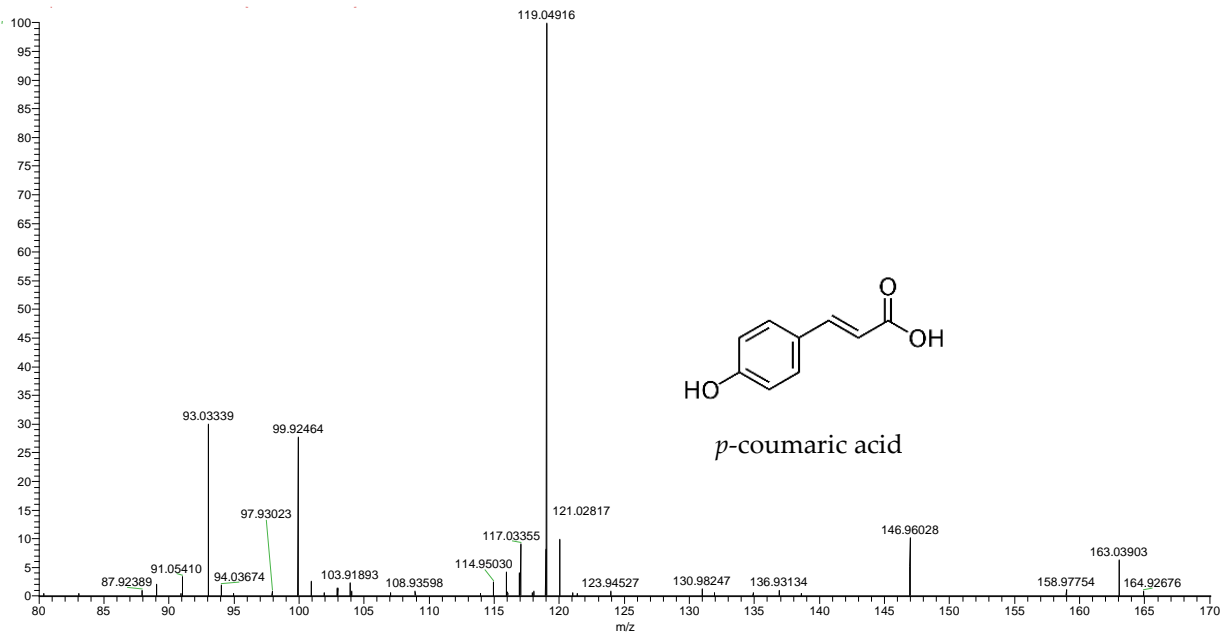

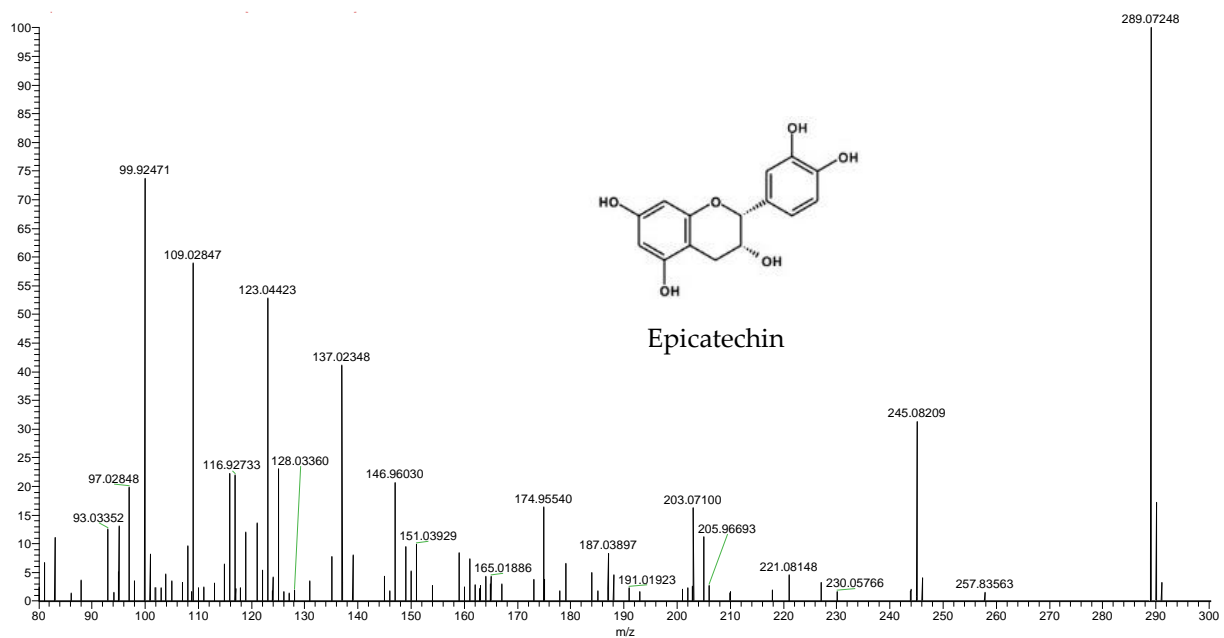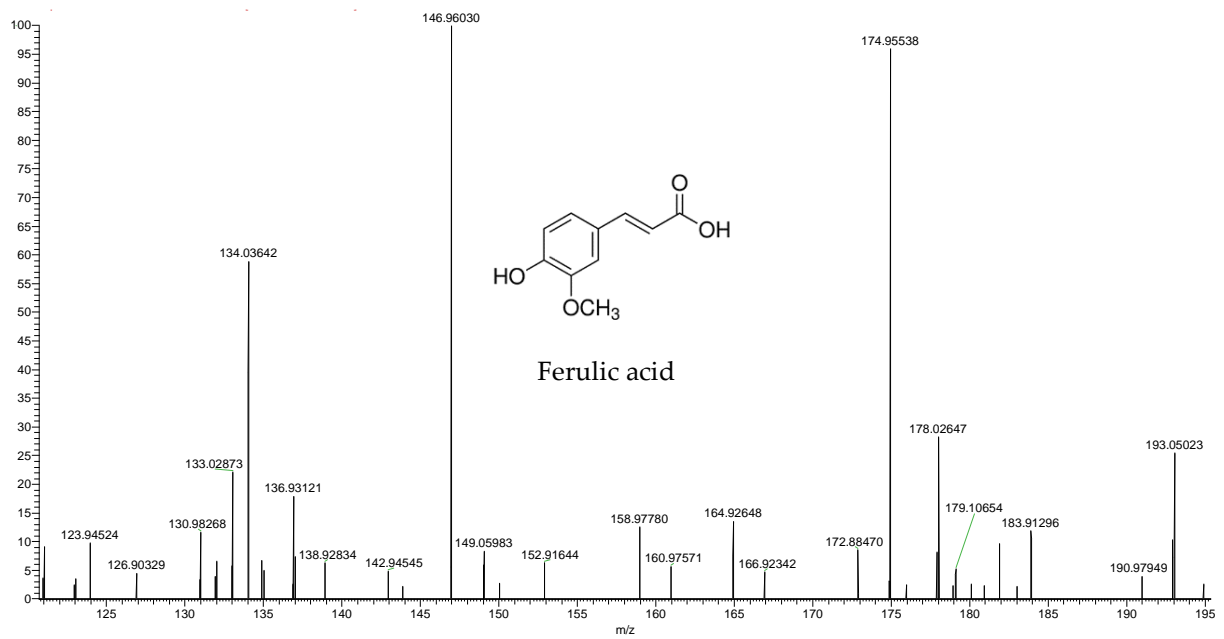

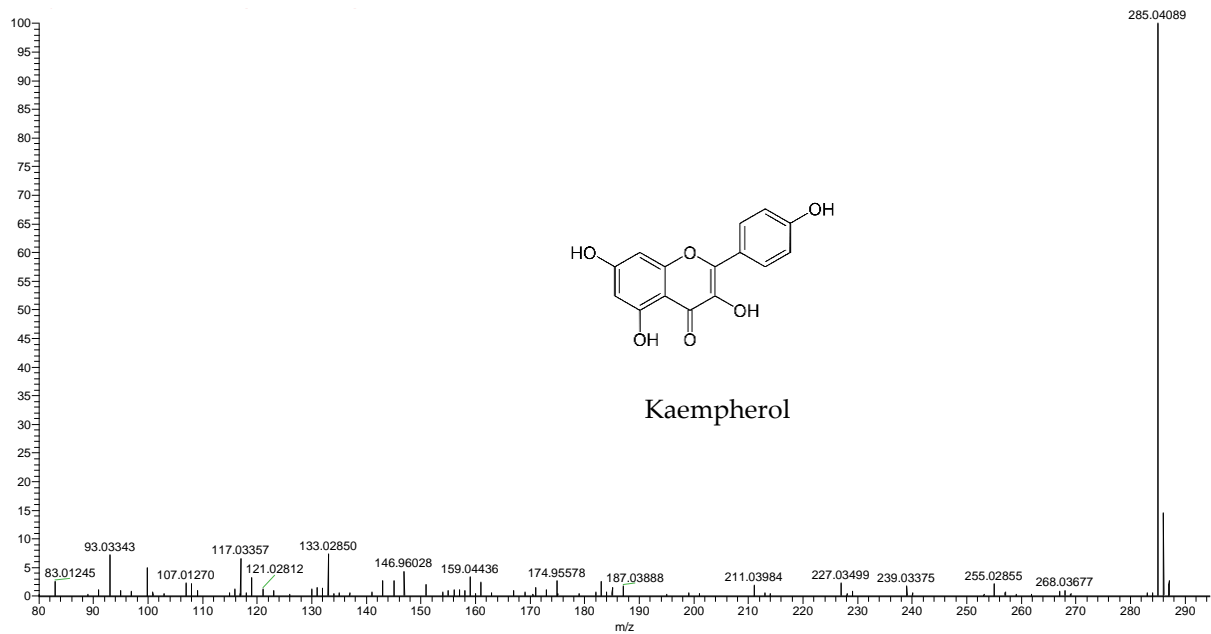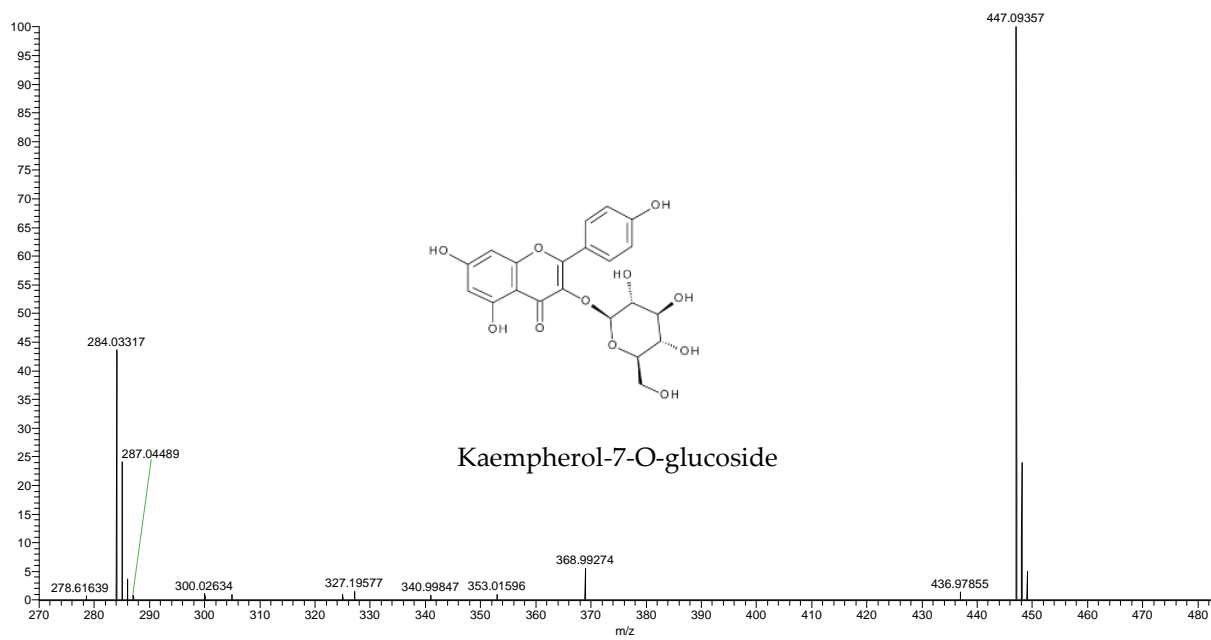

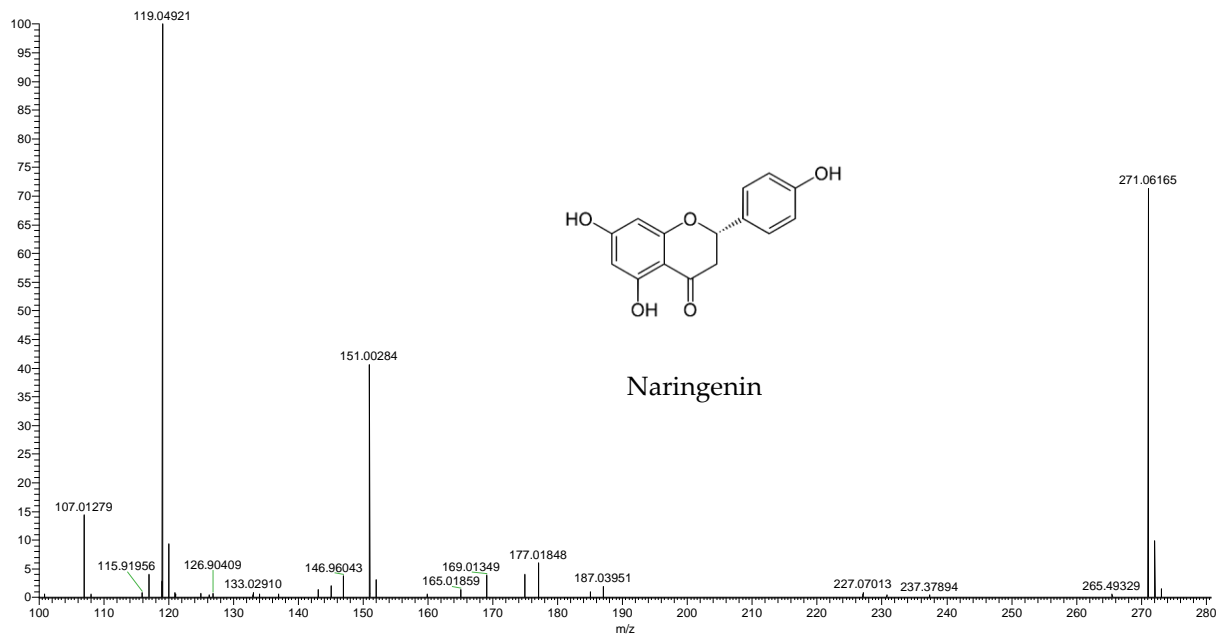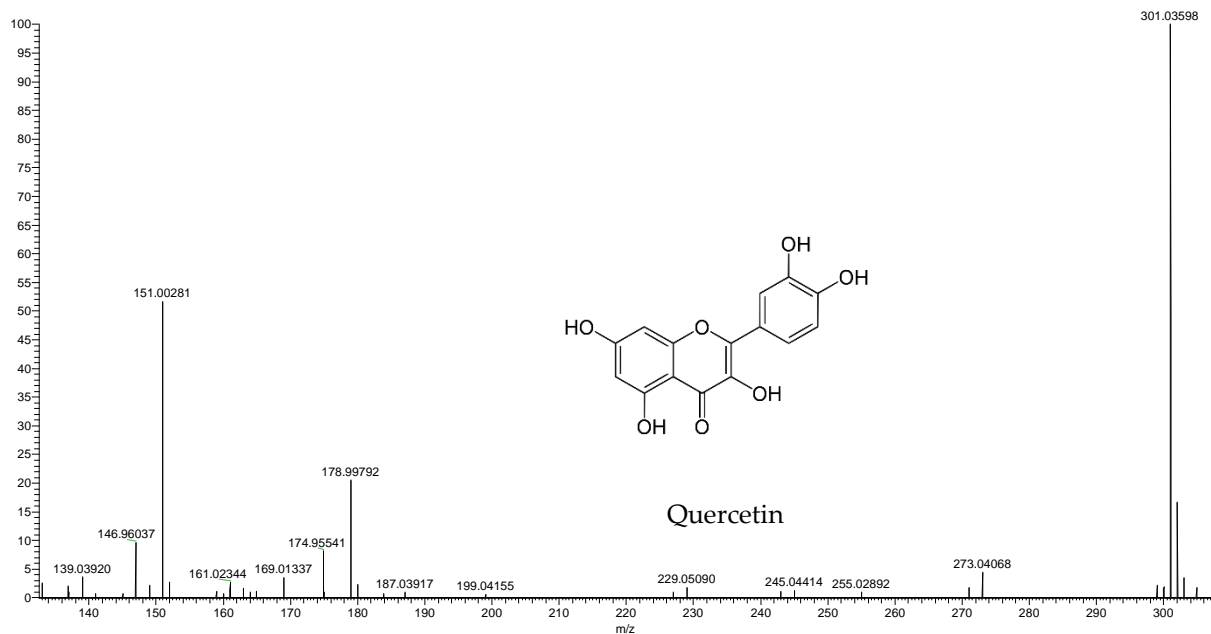

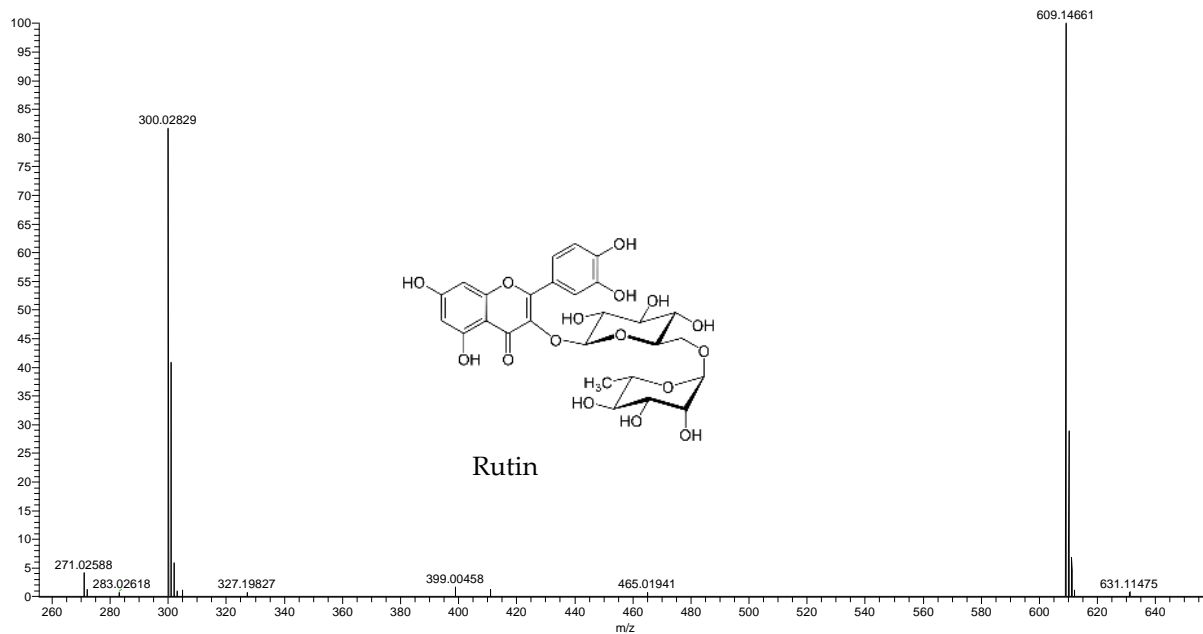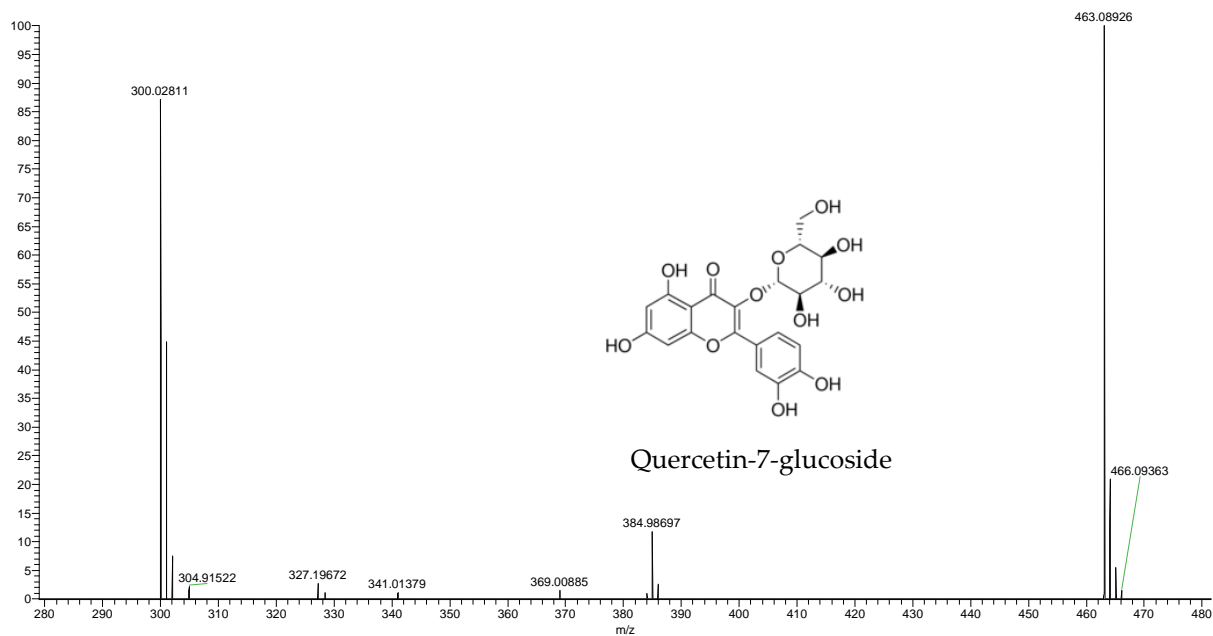

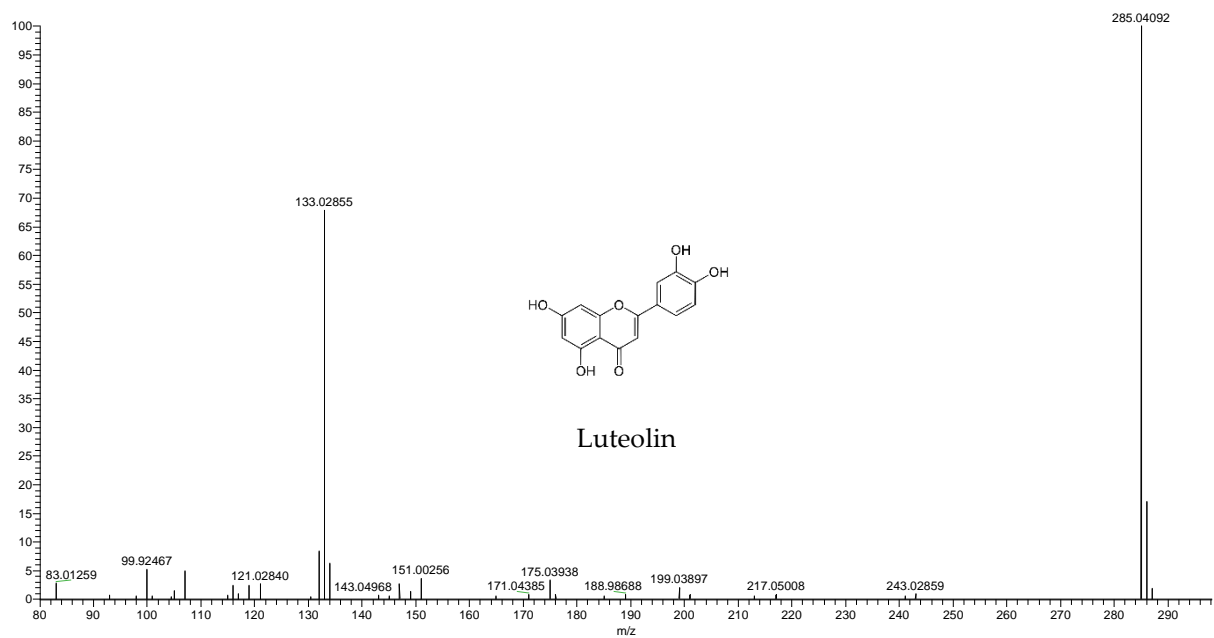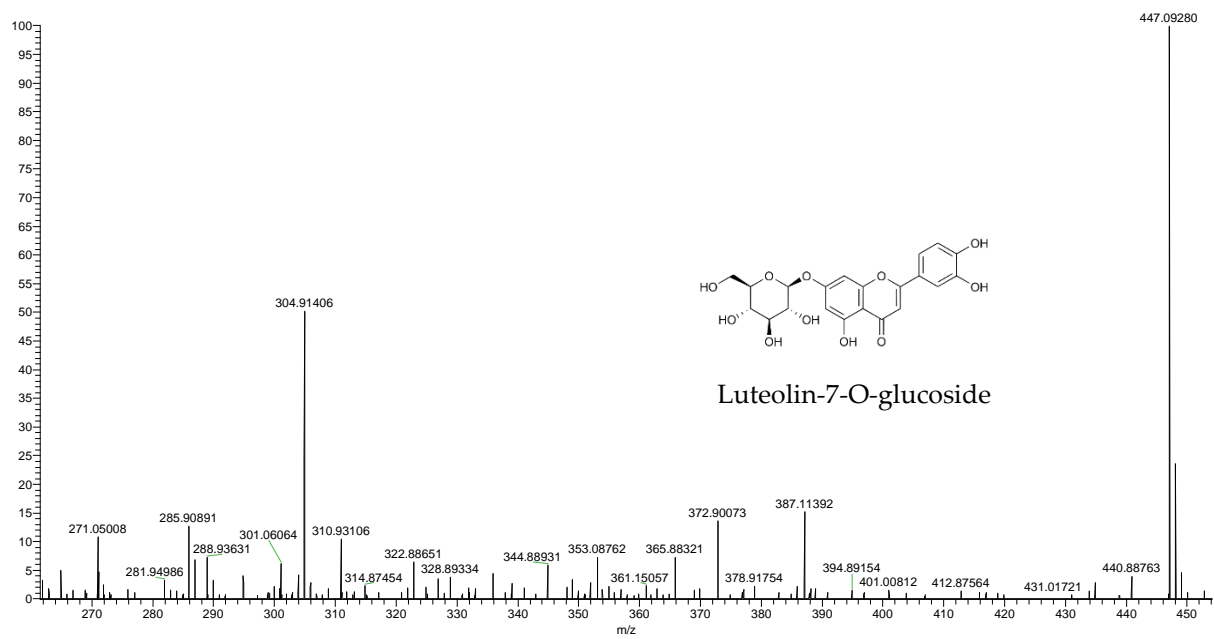

**Supplementary Figure S3.** MS/MS mass spectra of investigated compounds ( $n=22$ ) extracted of *C. sativa* inflorescences.
